# Supplementary material for: Inference of genomic lesions from single-cell RNA-seq in myeloma improves functional intraclonal and interclonal analysis
Source: PubMed Central journal article supplement — Blood Adv. 2024 Jun 5;8(15):3972–84. doi: 10.1182/bloodadvances.2023012409 (PMC11331727; doi:10.1182/bloodadvances.2023012409), 2024-06-05
Supplement: BLOODA_ADV-2023-012409-mmc1.pdf [file BLOODA_ADV-2023-012409-mmc1.pdf]

## **Supplementary Materials and Methods**

### **Materials and Methods**

#### **Sample collection and cell preparation**

BM samples were filtered with a 100 µm strainer and red blood cells were lysed (BulkLysis, Cytognos, Spain) for 15 min at 20 °C and washed with PBS. PCs were isolated using an immuno-magnetic CD138 positive selection kit according to manufacturer's instructions (EasySep™, STEMCELL Technologies, Vancouver, Canada). N=2 PCs samples were cryopreserved in 10% Dimethyl Sulfoxide, while N=3 samples were freshly processed. For patient P4, both CD138<sup>pos</sup> and CD138<sup>neg</sup> cell fractions were collected. Cell numbers and viability of the positive and negative fractions after PC separation were checked with Trypan Blue exclusion assay to ensure only samples with a viability >80% were used.

#### **Single-cell library preparation and sequencing**

Cells were counted and loaded into the Chromium Single Cell Chip G (PN-1000120) to yield a recovery of 9,000 single-cell transcriptomes. Subsequently, the libraries were pooled and sequenced on a NovaSeq6000 platform (Illumina Inc.) with a 150bp Paired End protocol, aiming at ~150000X and 15000 reads/cell for 5' gene expression and V(D)J enriched libraries, respectively. Raw sequences were preprocessed using Cell Ranger (version 5.0.0) pipelines using GRCh38 human reference transcriptome. In detail, mkfastq command for demultiplexing and FASTQ generation, then count and vdj commands for transcriptome and V(D)J raw data alignment and gene count matrix generation, respectively.

#### **Preprocessing and batch correction of scRNA sequencing datasets**

We used findintegrationanchors and intergratedata commands and proceeded with Seurat standard workflow to analyze the combined datasets. Batch-correction was carried out using the Harmony tool ([github.com/immunogenomics/harmony](https://github.com/immunogenomics/harmony)) (v1.2.0)<sup>25,26</sup> using the “fresh/frozen” state as the variable on which compute the correction. Then the merged data were scaled and used for principal component analysis. To identify canonical marker genes that were conserved across genotypes and define the

clusters, the FindConservedMarkers function was used. To identify the DEGs between genotypes or selected groups, the FindMarkers function was used.

### **Identification of IGH translocations with FUSCIA**

As input we used scRNA-seq.bam files and start-end coordinates of the genes, and the “discover\_discordant\_reads.py” function. For the analysis we investigated the main translocations involving the IGH locus in chr14 in MM (t(4;14), t(6;14), t(11;14), t(14;16), t(14;20)).

Barplots were created using the Prism 5.0 software (GraphPad Prism, RRID:SCR\_002798).

### **inferCNV**

In all samples, Ig genes were retained for this analysis. We used “denoise” and the default hidden markov model (HMM) settings, “subclusters” as analysis\_mode and “ward.D2” as hclust\_method. Low-probability CNVs were filtered out using “0.05” as threshold of tumor\_subcluster\_pval.

### **Pseudotime trajectory inference analysis**

To reduce the dimensionality of our data and to filter out uninformative genes a filtering step was applied: only genes robustly expressed (at least 4 reads) in at least 10 cells were considered as potentially interesting cell-type marker genes. Quantile normalization was used to remove unwanted technical or biological artifacts from the data. Dimensionality reduction was performed using principal components analysis (PCA). After clusters identification the next step was to determine the global structure of the underlying lineages. Finally, the slingshot function was applied to obtain the trajectory inference.



A.

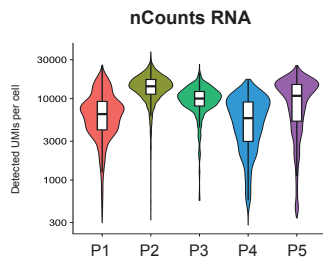

B.

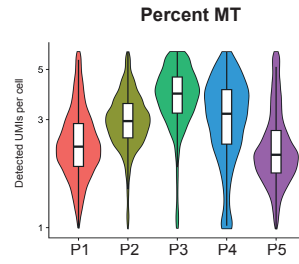

C.

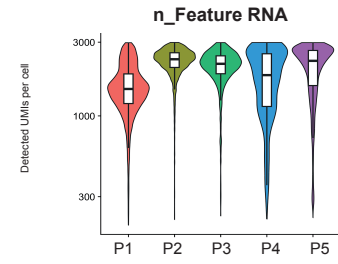

D.

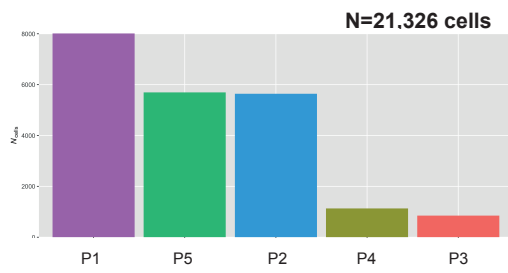

E.

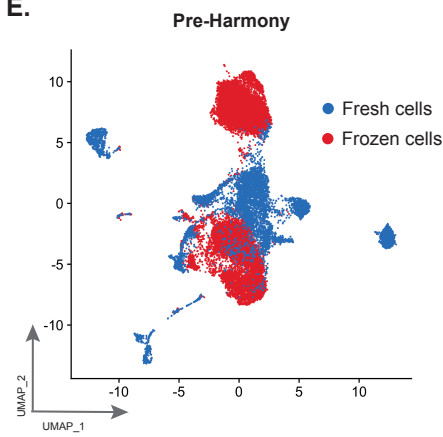

F.

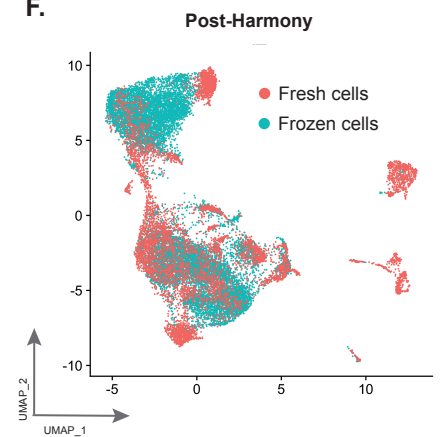

G.

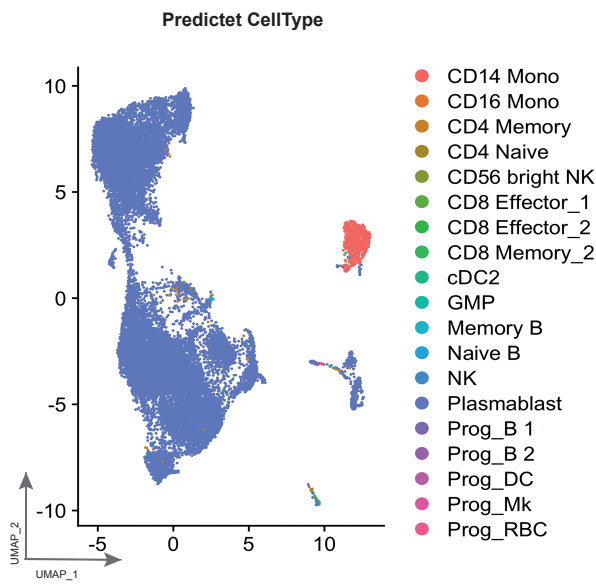

A.

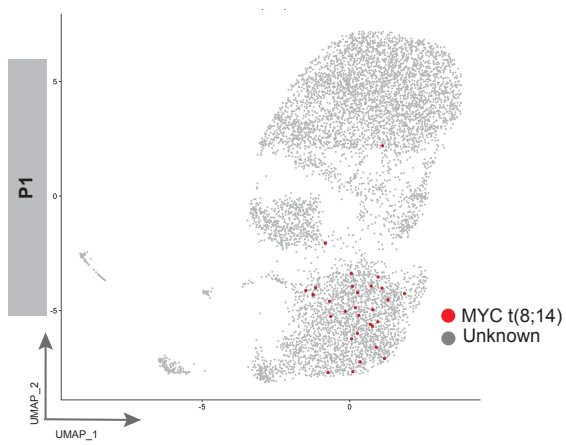

B.

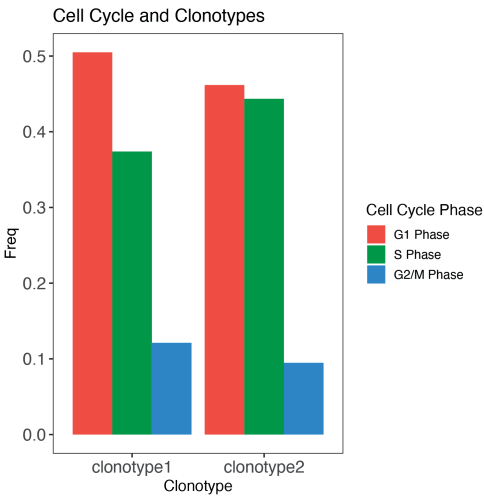

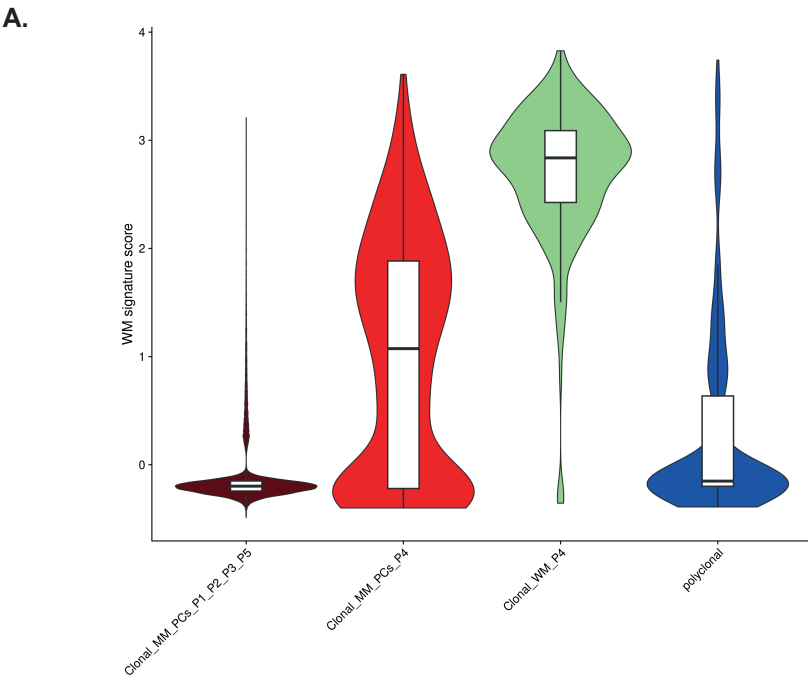

## Supplementary Figure Legends

**Supplementary Figure 1. Quality control of single cell transcriptome data.** **A-C.** Violin plot of quality metrics, as nCounts\_RNA, percent MT and n-feature RNA per patient. **D.** Bar plot of cell counts by patients. **E,F.** UMAP embedding of five patients before and after batch effect correction, by Harmony pipeline. Colored by fresh vs. frozen processing. **G.** UMAP visualization of “*predicted cell type*” annotation after the process of mapping datasets of human BMNC to annotated references in Seurat.

## Supplementary Figure 2. P1 clonotypes genomic inference and cell cycle analysis

**A.** t(8;14) fusion transcripts mapped on P1 UMAP. Cells characterized by fusion transcripts are highlighted by red dots. **B.** Barplot depicting the relative frequency (y-axis) of cell cycle phases: G1 phase (in red), S phase (in green), G2/M phase (in blue) with respect to the two dominant clonotypes of P1 (x-axis).

## Supplementary Figure 3. Waldenstrom gene signature inference

**A.** Violin plot showing a WM signature score inferred across the entire dataset including: clonal PC from MM patients P1, P2, P3, P5 (in brown), clonal PCs from MM patient P4 (in red), clonal WM cells (PCs and Memory B) from patient P4 (in green), and polyclonal cells from all patients (in blue).

**SUPPLEMENTARY TABLE 1.** Clonotype 1 V(D)J genes and CDR3 sequences.

| Patient | Clonotype 1 |            |        |                                                                          |                         |
|---------|-------------|------------|--------|--------------------------------------------------------------------------|-------------------------|
|         | Gene C      | Gene V     | Gene J | CDR3                                                                     |                         |
| P1      | IGHG1       | IGHV5-51   | IGHJ4  | TGTGCGAGAGGCGTAGTGGCTACGATTACCGCTCTTGACTACTGG                            | CARGVVATITALDYW         |
|         | IGKC        | IGKV1D-33  | IGKJ3  | TGTCAACAGTATGATAATCTCCCTATATTCACTTTC                                     | CQQYDNLPIFTF            |
| P4      | IGHA2       | IGHV5-10-1 | IGHJ6  | TGCATGCAAAATCTACAAACTCCTGGGTTT                                           | CATSSYDAAHCSGPTCHHYMDVW |
|         | IGKC        | IGKV2D-28  | IGKJ2  | TGTGCGACCTCCTCCTACGATGCCGCCCATTTGTAGTGGTCCACCTGCCACCACTACTACATGGATGTCTGG | CMQNLQTPGF              |

CDR: Complementarity-determining region

**SUPPLEMENTARY TABLE 2.** Clonotype 2 V(D)J genes and CDR3 sequences.

| Patient | Clonotype 2 |           |        |                                            |                |
|---------|-------------|-----------|--------|--------------------------------------------|----------------|
|         | Gene C      | Gene V    | Gene J | CDR3                                       |                |
| P1      | -           | -         | -      | -                                          | -              |
|         | IGKC        | IGKV1D-33 | IGKJ3  | TGTCAACAGTATGATAATCTCCCTATATTCACTTTC       | CQQYDNLPIFTF   |
| P4      | IGHM        | IGHV3-48  | IGKJ6  | TGTGCGAGAAGTCCTTATCACTATTACGGTCTGGACGTCTGG | CARSPYHYYGLDVW |
|         | IGKC        | IGKV3-20  | IGKJ1  | TGTCAGCACTATGGTAGTTCACCTATGTGGACGTTC       | CQHYGSSPMWTF   |

CDR: Complementarity-determining region

**Supplementary Table 3: WM signature gene list**

|    | feature | group | avgExpr          | logFC            | statistic  | auc               | pval                  | padj                  | pct_in           | pct_out          |
|----|---------|-------|------------------|------------------|------------|-------------------|-----------------------|-----------------------|------------------|------------------|
| 1  | CD52    | WM    | 2.30824159847504 | 1.09695403839427 | 14962680   | 0.746261741230514 | 2.72837743058084e-189 | 6.04799425036856e-187 | 89.7203999745239 | 56.8519968676586 |
| 2  | RALGPS2 | WM    | 2.0057830243136  | 1.00119535884933 | 15370866.5 | 0.766619990436992 | 5.90759831712257e-222 | 1.98414745296449e-219 | 86.2874976116171 | 56.7736883320282 |
| 3  | JCHAIN  | WM    | 1.68804751484783 | 1.49201896120123 | 14789954.5 | 0.737647079125536 | 5.08843340347824e-199 | 1.25328114727669e-196 | 54.3213808037705 | 12.1378230227095 |
| 4  | CD74    | WM    | 3.34707561752407 | 1.02796442316893 | 13308898.5 | 0.66377960154666  | 1.17125385112166e-84  | 7.41805260508964e-83  | 98.0701866123177 | 80.5794831636648 |
| 5  | MS4A1   | WM    | 2.54411909532941 | 1.31911880937416 | 16344861   | 0.815197840896866 | 0                     | 0                     | 91.4336666454366 | 62.9600626468285 |
| 6  | ITM2B   | WM    | 1.64865805407441 | 1.01462734612338 | 15435718.5 | 0.769854475598894 | 1.48987965997745e-231 | 5.79406358293336e-229 | 73.9507037768295 | 45.4189506656226 |
| 7  | SYNE2   | WM    | 1.24765396203244 | 1.02202291197789 | 14804463   | 0.738370688697661 | 1.05785715513833e-195 | 2.52145371590875e-193 | 57.2766065855678 | 16.6014095536413 |
| 8  | SERF2   | WM    | 1.98926557830106 | 1.18454664092789 | 16369150   | 0.816409251649    | 0                     | 0                     | 86.9880899305777 | 48.9428347689898 |
| 9  | CYBA    | WM    | 2.16578277616501 | 1.04804656441763 | 15660540.5 | 0.781067443943263 | 6.17949029360003e-246 | 2.79552574159657e-243 | 89.4146869626138 | 61.3938919342208 |
| 10 | CD79B   | WM    | 2.36550737323366 | 1.71194718322398 | 17855854   | 0.890558422501707 | 0                     | 0                     | 90.2872428507738 | 41.5035238841034 |
| 11 | POU2F2  | WM    | 1.69216424625106 | 1.11356281394611 | 15510775   | 0.773597908886291 | 5.40882082977949e-238 | 2.17995147879495e-235 | 74.6576651168715 | 36.0219263899765 |
